# Supplementary material for: FMRP regulates miR196a-mediated repression of HOXB8 via interaction with the AGO2 MID domain
Source: Royal Society of Chemistry journal article supplement (doi:10.1039/c4mb00066h), 2014-04-08
Supplement: c4mb00066h1.pdf [file c4mb00066h1.pdf]

## **SUPPLEMENTARY INFORMATION**

### **FMRP regulates miR196a-mediated repression of HOXB8 via interaction with AGO2 MID domain**

**Ying Li<sup>a</sup>, Wei Tang<sup>a</sup>, Li-rong Zhang<sup>a</sup>, Chun-yang Zhang<sup>\*a</sup>**

<sup>a</sup>Single-Molecule Detection and Imaging Laboratory, Shenzhen Institute of Advanced Technology, Chinese Academy of Sciences, Guangdong 518055, China

\*To whom correspondence should be addressed.

This file includes:

Supplementary Figures S1-2

Supplementary Table S1-2

Supplementary Figures

A

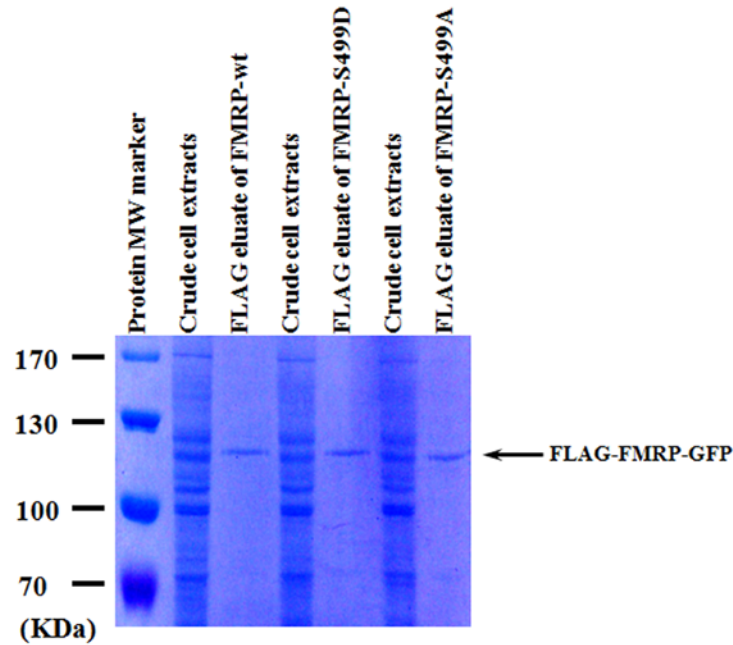

B

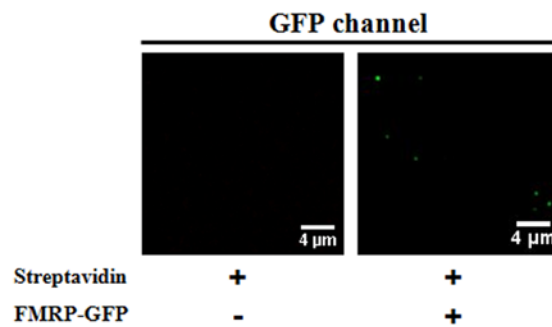

C

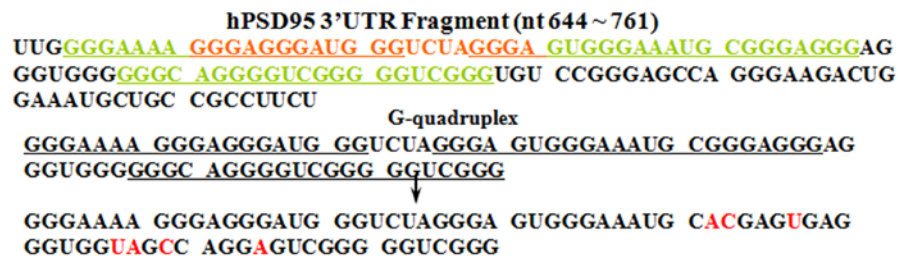

Fig. S1 (A) Commissie Blue Staining analysis of crude cell extracts and purified recombinant wild-type FMRP-GFP, phospho-FMRP mutant (S499D), and unphospho-FMRP mutant (S499A). Protein molecular-weight marker sizes are shown on the left. Purified protein is labeled with an arrow on the right. (B) Single-molecule images. The first one was from a clean surface with streptavidin conjugation. The second one was from a streptavidin-conjugated surface treated with FMRP-GFP expressed cell extracts. Few fluorescent debris molecules were visible. (C) Sequence of human PSD95 3'UTR fragment (nucleotide 644–761) and mutagenesis of the putative G-quadruplex. The miRNA recognition sites are colored in orange. Red characters represent the introduced substitutions.

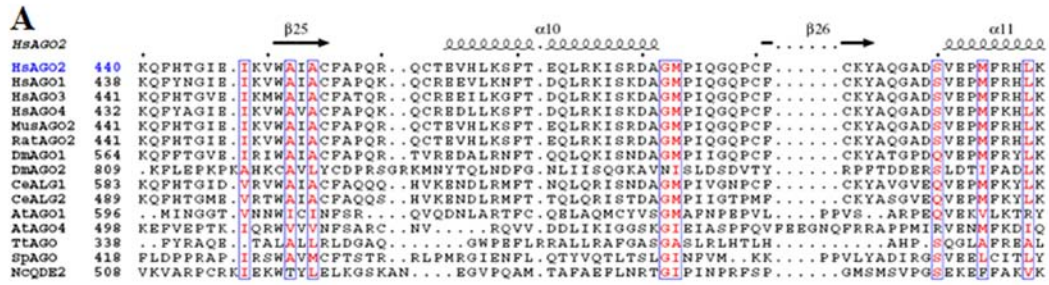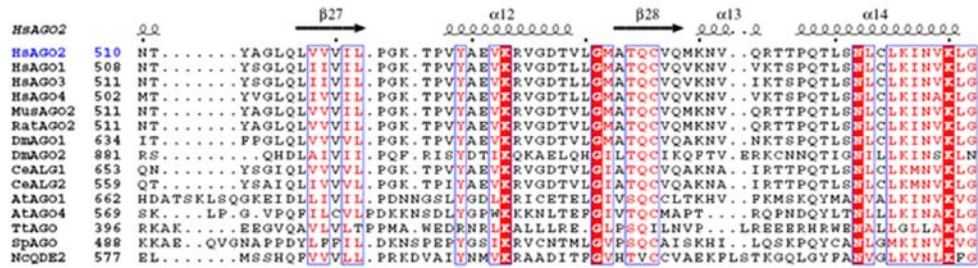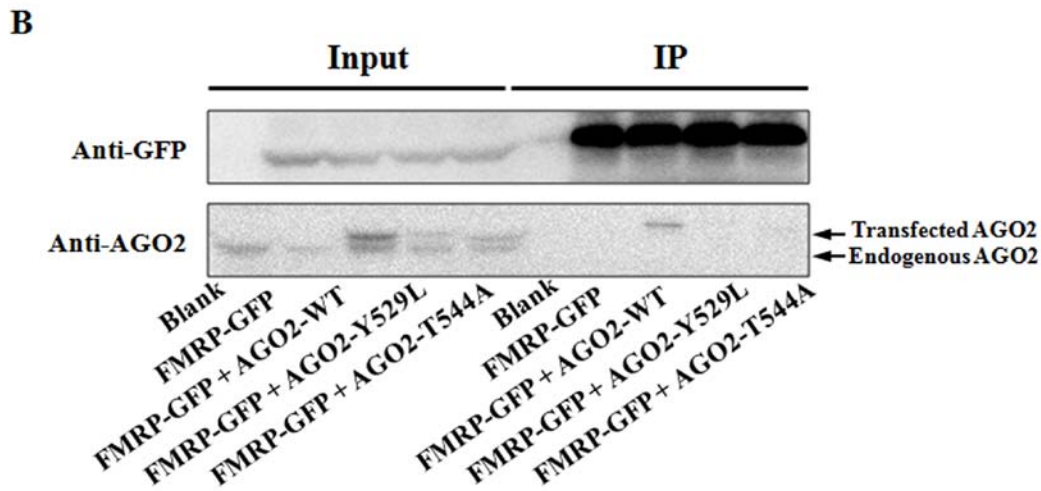

Fig. S2 (A) Structure-based sequence alignment of the hsAGO2 MID domain (Top) with eukaryotic MID domains as well as eubacterial homologues (Tt) involved in the miRNA pathway. The invariant positions are highlighted in red, and the highly conserved positions are colored in red. Two invariant Lys residues (K533 and K570 in hsAGO2) shared by the two sulphate-binding pockets are marked by green triangles. Conserved Tyr residues (Y529 in hsAGO2) involved in the coordination of first pocket for miRNA binding is marked by pink triangle. The invariant threonine or serine (T544 of hsAGO2) involved in the coordination of second pocket is marked by red triangle. AGO, Argonaute; At, Arabidopsis thaliana; Ce, Caenorhabditis elegans; Dm, Drosophila melanogaster; Hs, Homo sapiens; Mus, Mus musculus; Nc, Neurospora crassa; QDE-2, quelling-defective2; Rat, Rattus norvegicus; Sp, Schizosaccharomyces pombe; Tt, Thermus thermophilus. (B) Co-immunoprecipitation of FMRP with AGO2. Non-transfected HEK29T cells (Blank) and the indicated transfected cells were subjected to immunoprecipitation (IP) with anti-GFP followed by immunoblotting with antibodies as shown.

## Table S1 oligonucleotides.

### Synthetic RNA oligos:

Biotin-miR196a: 5'P-UAGGUAGUUUCAUGUUGUUGGG-3' Biotin

Random RNA: UUCAAGUAAGUAAUCCAGAUAGCUGUAUGACCAGAGUACCG

### miRNA and 3'UTR cloning

|                            |                                                                              |
|----------------------------|------------------------------------------------------------------------------|
| Has-miR-196a               | F: GAGCTCGAG CCAGATGCAGGGGAATAGCTC<br>R: GAGGGTACC TTGGAATTGGCTGGACCCTC      |
| Full-length 3'UTR of PSD95 | F: GAGGCGATCGC CCTACATCTGGGTCCAGCC<br>R: GCGACGCGT TCTGTCTCTTCTTCACTCTCTC    |
| Full-length 3'UTR of HOXB8 | F: GAGGCGATCGC CGCTTCAGCTGGGACTGC<br>R: GCGACGCGT TCGGGTTCTCGCTTGTAAC        |
| G-quadruplex in PSD95      | F: GAGGGTACC TTGGGAAAAGGGAGGGATG<br>R: GAGCTCGAG AGAAGGCGGCAGCATTC           |
| U-rich Fragment in HOXB8   | F: GAGGGTACC CAATTGTCTTTTTTTCCTTTGAACG<br>R: GAGCTCGAG GAGACAGAAAGAATTACGGCG |

### In vitro Transcription

|                 |                                                                    |
|-----------------|--------------------------------------------------------------------|
| G-quadruplex    | F: CGCCAGGGTTTTCCAGTCACGAC<br>R: TACCGTCGACCTCGAGAGAAGGCGGCAGCATTC |
| U-rich Fragment | F: CGCCAGGGTTTTCCAGTCACGAC<br>R: TACCGTCGACCTCGAGGAGACAGAAAGAATTAC |

### Mutagenesis

|                                        |                                                                                                            |
|----------------------------------------|------------------------------------------------------------------------------------------------------------|
| $\Delta$ U I                           | F: AGCCTCCTTGTGCAATTGTCGTGTCGTGCCTTTGAACGTGCTTCTTTG<br>R: CAAAGAAGCACGTTCAAAGGCACGACACGACAATTGCACAAGGAGGCT |
| $\Delta$ U II                          | F: TTTCTTTGAACGTGCTTCGTAGTAATGACCAAGGTACCG<br>R: CGGTACCTTGGTCATTACTACGAAGCACGTTCAAAGGAAA                  |
| $\Delta$ U III                         | F: GACCAAGGTACCGATAGCTGCTAAGCTCTCCCAACAACATG<br>R: CATGTTGTTGGGAGAGCTTAGCAGCTATCGGTACCTTGGTC               |
| $\Delta$ U IV (Luc report)             | F: ACTGCCTATTCACGCCGTAATGCTAGCTGTCTCCCTTCTCTCTC<br>R: GAGAGAGAAGGGAGACAGCTAGCATTACGGCGTGAATAGGCAGT         |
| $\Delta$ U IV (In vitro transcription) | F: ACTGCCTATTCACGCCGTAATGCTAGCTGTCTCCTCGAGGTCGAC<br>R: GTCGACCTCGAGGAGACAGCTAGCATTACGGCGTGAATAGGCAGT       |
| $\Delta$ G                             | F: GAGTGGGAAATGCACGAGTGAGGGTGGTAGCCAGGAGTCGGGGGTCGG<br>R: CCGACCCCCGACTCCTGGCTACCACCCTCACTCGTGCATTTCCCACTC |
| AGO2-Y529L                             | F: CGGCAAGACGCCCCTGTTGGCCGAGGTC<br>R: GACCTCGGCCAACACGGGCGTCTTGCCG                                         |
| AGO2-T544A                             | F: CTGGGGATGGCCGCGCAGTGCGTGC<br>R: GCACGCACTGCGCGGCCATCCCCAG                                               |

### qPCR

|                |                                                      |
|----------------|------------------------------------------------------|
| Firefly Luc    | F: GACCGGCTGAAGAGCCTGATC<br>R: TTGCAGCAGGATGCTCTCCAG |
| $\beta$ -Actin | F: AGAGCTATGAGCTGCCTGAC<br>R: TACGGATGTCAACGTCACAC   |

**Table S2 Putative FMRP recognition sites in the downstream neighborhood of MRE in the reported neural targets of FMRP-associated miRNA.**

| miRNAs  | Target in neurons | Function                                                                                           | Cell or Tissue                          | Potential FMRP binding sites in 3'UTR of target mRNA                                                                                                                                                                                   | Sp.        | Ref.         |
|---------|-------------------|----------------------------------------------------------------------------------------------------|-----------------------------------------|----------------------------------------------------------------------------------------------------------------------------------------------------------------------------------------------------------------------------------------|------------|--------------|
| miR-9   | Foxp1             | Modify motor neuron columnar organization in the spinal cord                                       | Spinal cord from chick embryos; Neuro2A | AAUUUAUAUUCUUUGUACCUUUUUUCUAA<br>AAUUACCAAAGAUAUUACACAAAGGUA<br>AAUUAUGUUCUCUGUUUUUAUGCUUUUAUCUGA<br>AUUUAGAAGACCAGUAGGUAUUGGAACCA<br>AAGUUGUUACUUUUUUCUAGUAGUUAUUU<br>UUCUUUUUCUUUUUGUGUA                                             | gga        | <sup>1</sup> |
| miR-9   | Foxp2             | Relate to Neurite outgrowth and their radial migration in embryonic mouse neocortex                | Mouse embryonic neocortex               | AGCCCAUGGUUUUUUUUUCAGUCAAAACCA<br>AAGUUAACAUAUAAUUCUGCCUCUGCUUAUA<br>CGGGAUUGAACACUAACACACUCCCUUCA<br>AAGACUUGUGCAG                                                                                                                    | mmu        | <sup>2</sup> |
| miR-9   | Her6              | Control timing of commitment and cell-cycle exit within progenitor populations during neurogenesis | Zebrafish embryos                       | GGUAUCUUUUCACGUUGUGAUGCCAAAGA<br>UAUGUUGAAUGCGCUUUAAGUUUCUUCUU<br>UUUGGAAGACAAAUAUUGACAUUUGAAA<br>UGAAAAA                                                                                                                              | dre        | <sup>3</sup> |
| miR-9   | Zic5              | Control timing of commitment and cell-cycle exit within progenitor populations during neurogenesis | Zebrafish embryos                       | UUAAUAAUGUUGGUCUGGAAGUACAGAU<br>CACCAAAGAAUAAUAAUAAUUUUGGUGAAA<br>AGAAUGAUGCUUUUUUAUCGUGUUCUGUA<br>AAAAAGGUCUUACUUG                                                                                                                    | dre        | <sup>3</sup> |
| miR-9   | Hes1              | Regulate the proliferation and differentiation of neural stem cells in the developing brain        | Mouse Embryos; HEK293T                  | UUUUUUACACGAGAUUUCUUUUUUUUGU<br>GAUGCCAAAGAUGUUGA AAAAUGCUCUUA<br>AAAUAUCUUCUUUGGGGAAGUUUAUUUG<br>AGAAUAUAAUAAAA                                                                                                                       | rno        | <sup>4</sup> |
| miR-124 | BACE1             | Alleviate cell death in the process of AD by targeting BACE1                                       | PC12; Hippocampal neurons               | UGGAGCUCACCCAAGGUCACCAAACAACUU<br>GGUUGUGAACCAACUGCCUUAACCUUCUUGG<br>GGGAGGGGGUUAGCUAGACUAGGAGACC<br>AGAAUGGAAUUGGGAAGGGGUGAG                                                                                                          | hsa        | <sup>5</sup> |
| miR-124 | Zif-268 (EGR1)    | Regulate spatial learning and social interaction                                                   | Mouse hippocampus and cortex; HEK293    | AAUUUUUUUGCCCGUCCUUUGGUUUCAAAA<br>AGUUUCACGUCUUGGUGCCUUUUGUGUGAC<br>ACGCCUUGCCGAUGGCUUGACAUGCGCAGA<br>UGUGAGGGACAC                                                                                                                     | mmu        | <sup>6</sup> |
| miR-124 | Sox9              | Regulate the timing of neuronal differentiation along the SVZ stem cell lineage                    | Mouse SVZ; HeLa                         | CUUGGAUUUCAAGAGUAGCUGCCUUA<br>AAAGAAAGAAAAAAGAAAGAAAGGAAGGA<br>AGGAAGGAAGGAAGGGAGAGAGAGAGAGA<br>AAGCCUUCUUUUGC                                                                                                                         | mmu        | <sup>7</sup> |
| miR-124 | Dlx2              | Involve in interneuron formation                                                                   | Mouse SVZ; HeLa                         | UUUUUUUUUUUUUUUUUUUUUUUUUUUUUU<br>UGCCUUUGCGGAUGACCUCUUUUUGAUGUU<br>AAAAAAAAAACUGAUUUUUUUUUAAUAUGUGG<br>ACGUGCAAAAAA                                                                                                                   | mmu        | <sup>7</sup> |
| miR-124 | CREB1             | Constrain serotonin-induced synaptic facilitation                                                  | Aplysia pleural ganglia; HEK293         | AAUGGUGGGGGAACUUUCAAGGCAUGUUUU<br>GCGUGUCUUAUAUUUUUCCUGCACUACAUA<br>GGCCAUCUGGGUUGUGGGACACCCGUGUUC<br>UGAUGUGUGUG<br>AUGAUUUCAAGGUUUGUGCUGAGCUCCUUG<br>AUUGCCUUAAGGACAGAAUUACCCAGCCU<br>CUUGAGCUGAAGUAAUGUGUGGGCCGCAUG<br>CAUAAAGUAAGU | apc<br>hsa | <sup>8</sup> |

|          |               |                                                                                                     |                         |                                                                                                                                                                                                                                           |     |    |
|----------|---------------|-----------------------------------------------------------------------------------------------------|-------------------------|-------------------------------------------------------------------------------------------------------------------------------------------------------------------------------------------------------------------------------------------|-----|----|
| miR-124  | SCP1 (CTDSP1) | Induce neurogenesis                                                                                 | P19; HEK293             | UUCAUUUUUAGGUGCCUCUAAACCCAGAU<br>GUCACGUGCCUUCAGAGUAUCAACA<br>GGGAGUC<br>GUGGAAACCUUCUUGUGGGUUA<br>GGGAGUC<br>UCCAAACCUAAC                                                                                                                | mmu | 9  |
| miR-124  | wit           | Retrograde BMP signaling pathway, whose activation in neurons increases synaptic release at the NMJ | S2-R+                   | UAUCUAGUAUACCCCCCUUGGAUGAAUUU<br>UCGGUGAAUGCCUUU<br>UAGUCGUUCUCUUUA<br>GUACUUAGACCAAAACACCCACAGCCUUUC<br>AAUCACAUAAAAU                                                                                                                    | dme | 10 |
| miR-124  | Med           | Retrograde BMP signaling pathway, whose activation in neurons increases synaptic release at the NMJ | S2-R+                   | GGAUUUUGUGUUUUUCAUUUGCAAUUCUG<br>AUUACGAUUAUGUUUGCCUUUGAUUAUU<br>GAUAAUAAUUUUUAUAAAAAUUGAAACA<br>ACUUAGAAGUCUUAAG                                                                                                                         | dme | 10 |
| miR-124  | Mad           | Retrograde BMP signaling pathway, whose activation in neurons increases synaptic release at the NMJ | S2-R+                   | AUCUUUUGUUAUCUUAAGUAAAACUAAUA<br>UUGUUUAGACCACGAGAAAAUUGCCUUU<br>UU<br>AUAAUAAAUAUCAUGUAUAACUUUACUCUA<br>GUUAUCGUAAGCUUAUGAUUUUUCUCUGAUU<br>UUGUUUUGAAUUA                                                                                 | dme | 10 |
| miR-125b | NR2A (GRIN2A) | Affect dendritic spine morphology                                                                   | Rat Hippocampal neurons | AUGUACGUAAGUUUGCAUUUCCUCCUUCU<br>GGUGAUGACUCAGGGU<br>UGUAUAGUAUCUG<br>UUACCCCUUCCCUCCAGAGUAACCAUAC<br>UCGUUCCGUUUC                                                                                                                        | rno | 11 |
| miR-125b | Nestin (NES)  | Orchestrates cell proliferation, differentiation and migration in neural stem/progenitor cells      | Neural progenitors      | GAAAAGACCAUCUGCCCGGCACUGGGGACU<br>UAGGGUGUGGGGAGGGGAGGACGCCUC<br>CAAGCCCGCUCUCCUGCUCAGGAGCAGCACU<br>CUAACUUACGA                                                                                                                           | hsa | 12 |
| miR-125b | SMO           | Withdraw Hedgehog activity during cerebellar neuronal progenitor differentiation                    | Daoy cells              | CACCCAGGGACAGGGCCUUGGAGCUCAGG<br>GUCCUUGUUUCUGCCUGCCAGCUGCAGCC<br>UGGUUGGCAGCAUCUGCUCCAUCG                                                                                                                                                | hsa | 13 |
| miR-128  | PDGFRA        | Repress giNSC self-renewal and enhance differentiation                                              | giNSCs; HEK293          | CCUUUGUUUAUAUUUUUUUAAACUGUGAU<br>AUUCCCACAGGCACGUUAACUGUUGCACU<br>UUUGAAUGUCCAAAUUUUAUAUUUUAGAA                                                                                                                                           | mmu | 14 |
| miR-128  | Reelin (RELN) | Modulating neuroblastoma progression and aggressiveness                                             | SH-SY5Y; HEK293         | AACAGAGUGAUUUGUAAAACAGUGGUUGU<br>UUUUUCAUUGUGU<br>UUUCUUCGUGGAUUGU<br>UUUUUCUGCGGGUCAUUAUACUACCUUCUG<br>AUGAAGUUGUACAA<br>AGCCUUCUCAAGACCGAGUGUACACCACU<br>UUCCACACUGUGAACUAAUGACAAGUGAC<br>UUUUUUGCUCAUAAGUAAUGUCUUCUUGU<br>UGAUGUGUCCGU | has | 15 |
| miR-128  | DCX           | Modulating Neuroblastoma progression and aggressiveness                                             | SH-SY5Y; HEK293         | UGCCUUGUUAAACAGCCAACACUGAAAACAC<br>UGUGAGAAUUUGUUUUUCAGGUCUGACACCU<br>UUCAGUCUCUUUUUAUAGCAAGAAUCAAU<br>AUCCUUUUUAUAA                                                                                                                      | hsa | 15 |
| miR-128  | NTRK3         | Regulate cytoskeleton organization                                                                  | SH-SY5Y; HeLa           | AUCCACCACUGGCAGGGUUGCCCUUCCCU<br>CCAAUCAUCACUGUGCUCCUUUUUUCCCGG<br>CCUACGAGGCAGCUCUCCUGCCACUAUCUUUA<br>GAGCCAAUAAAG                                                                                                                       | hsa | 17 |
| miR-128  | Sp1           | Regulate neural plasticity                                                                          | Mouse cortical neurons; | AGCCGAGAACAAAAAGAAAUUCUUGUCUAC<br>CACUGUGAUUAUAGGAGAAACUGGGAGA<br>AAUUAUCCUGCUUUCUCUAUGGCCUGAUUC                                                                                                                                          | mmu | 16 |

|         |         |                                                      |                                                     |                                                                                                                     |     |                   |
|---------|---------|------------------------------------------------------|-----------------------------------------------------|---------------------------------------------------------------------------------------------------------------------|-----|-------------------|
|         |         |                                                      | HEK293T                                             | CAGAAGAGACUGAU                                                                                                      |     |                   |
| miR-128 | Ppp1cc  | Regulate neural plasticity                           | Mouse cortical neurons; HEK293T                     | AAUUGUCAUAAAUGCAUUCUGUUGAUACAA<br>ACCACUGUGAACAAUUUUUUUCCAGUUUG<br>UUUGAAAGGGA CUGCUUUCCCUCAUUGUCU<br>UGUCAUGUACAAA | mmu | <sup>16</sup>     |
| miR-132 | p250GAP | Regulate neuronal morphogenesis and dendritic growth | PC12; Rat cortical neurons; Rat hippocampal neurons | GCCUGCGAGCAAUAGAGUUGAAGCAGCCU<br>CUGCUGGACAGUGGACUGUU CUAUUUUUUU<br>CAAUAACCAAAAAGAUUAAACAAAAAAU                    | hsa | <sup>18, 19</sup> |
| miR-219 | PLK2    | Relate to synaptic dysfunction implicated in ASD     | Human lymphoblastoid cell lines                     | AGGCUAAGGCAUACAGUUCUUGACUUUGGA<br>CAAUCCAAGAGUGAACAGAAUGCAGUUUU<br>CCUUGAGAUACCUGUUUUAAAAGGUUUUUC<br>AGACAAUUUUUGC  | hsa | <sup>20</sup>     |

The experimentally validated miRNA recognition sites (MREs) are highlighted in yellow, and the predicted but unvalidated MREs are highlighted in grey. Three putative modes for FMRP to recognize the MRE are displayed distinctively. The first oligo(U) elements are underlined. The potential G-quartet is shown in box. The frequent RNA-recognition elements of FMRP discovered in recent reports are colored in cyan. apc: Aplysia californica; dme: Drosophila melanogaster; dre: Danio rerio; gga: Gallus gallus; hsa: Homo sapiens; mmu: Mus musculus; rno: Rattus norvegicus; xla: Xenopus laevis.

## References

1. G. Otaegi, A. Pollock, J. Hong and T. Sun, *J Neurosci*, 2011, **31**, 809-818.
2. Y. M. Clovis, W. Enard, F. Marinaro, W. B. Huttner and D. De Pietri Tonelli, *Development*, 2012, **139**, 3332-3342.
3. M. Coolen, D. Thieffry, O. Drivenes, T. S. Becker and L. Bally-Cuif, *Dev Cell*, 2012, **22**, 1052-1064.
4. S. L. Tan, T. Ohtsuka, A. Gonzalez and R. Kageyama, *Genes Cells*, 2012, **17**, 952-961.
5. M. Fang, J. Wang, X. Zhang, Y. Geng, Z. Hu, J. A. Rudd, S. Ling, W. Chen and S. Han, *Toxicology letters*, 2012, **209**, 94-105.
6. Y. Yang, X. Shu, D. Liu, Y. Shang, Y. Wu, L. Pei, X. Xu, Q. Tian, J. Zhang, K. Qian, Y. X. Wang, R. S. Petralia, W. Tu, L. Q. Zhu, J. Z. Wang and Y. Lu, *Neuron*, 2012, **73**, 774-788.
7. L. C. Cheng, E. Pastrana, M. Tavazoie and F. Doetsch, *Nat Neurosci*, 2009, **12**, 399-408.
8. P. Rajasethupathy, F. Fiumara, R. Sheridan, D. Betel, S. V. Puthanveetil, J. J. Russo, C. Sander, T. Tuschl and E. Kandel, *Neuron*, 2009, **63**, 803-817.
9. J. Visvanathan, S. Lee, B. Lee, J. W. Lee and S. K. Lee, *Genes Dev*, 2007, **21**, 744-749.
10. K. Sun, J. O. Westholm, K. Tsurudome, J. W. Hagen, Y. Lu, M. Kohwi, D. Betel, F. B. Gao, A. P. Haghghi, C. Q. Doe and E. C. Lai, *PLoS Genet*, 2012, **8**, e1002515.
11. D. Edbauer, J. R. Neilson, K. A. Foster, C.-F. Wang, D. P. Seeburg, M. N. Batterton, T. Tada, B. M. Dolan, P. A. Sharp and M. Sheng, *Neuron*, 2010, **65**, 373-384.
12. Y. Cui, Z. Xiao, J. Han, J. Sun, W. Ding, Y. Zhao, B. Chen, X. Li and J. Dai, *BMC Neurosci*, 2012, **13**, 116.
13. E. Ferretti, E. De Smaele, E. Miele, P. Laneve, A. Po, M. Pelloni, A. Paganelli, L. Di Marcotullio, E. Caffarelli, I. Screpanti, I. Bozzoni and A. Gulino, *EMBO J*, 2008, **27**, 2616-2627.
14. T. Papagiannakopoulos, D. Friedmann-Morvinski, P. Neveu, J. C. Dugas, R. M. Gill, E. Huillard, C. Liu, H. Zong, D. H. Rowitch, B. A. Barres, I. M. Verma and K. S. Kosik, *Oncogene*, 2012, **31**, 1884-1895.
15. C. Evangelisti, M. C. Florian, I. Massimi, C. Dominici, G. Giannini, S. Galardi, M. C. Bue, S. Massalini, H. P. McDowell, E. Messi, A. Gulino, M. G. Farace and S. A. Ciafre, *FASEB J*, 2009, **23**, 4276-4287.
16. Q. Lin, W. Wei, C. M. Coelho, X. Li, D. Baker-Andresen, K. Dudley, V. S. Ratnu, Z. Boskovic, M. S. Kobor, Y. E. Sun and T. W. Bredy, *Nat Neurosci*, 2011, **14**, 1115-1117.
17. M. Guidi, M. Muinos-Gimeno, B. Kagerbauer, E. Marti, X. Estivill and Y. Espinosa-Parrilla, *BMC Mol Biol*, 2010, **11**, 95.
18. N. Vo, M. E. Klein, O. Varlamova, D. M. Keller, T. Yamamoto, R. H. Goodman and S. Impey, *P Natl Acad Sci USA*, 2005, **102**, 16426-16431.
19. G. A. Wayman, M. Davare, H. Ando, D. Fortin, O. Varlamova, H. Y. Cheng, D. Marks, K. Obrietan, T. R. Soderling, R. H. Goodman and S. Impey, *P Natl Acad Sci USA*, 2008, **105**, 9093-9098.
20. T. Sarachana, R. Zhou, G. Chen, H. K. Manji and V. W. Hu, *Genome Med*, 2010, **2**, 23.
